# Supplementary material for: Premenstrual symptoms across the lifespan in an international sample: data from a mobile application
Source: PubMed Central journal article supplement (PMC9492621; doi:10.1007/s00737-022-01261-5), 2022-08-26
Supplement: 737_2022_1261_MOESM1_ESM.pdf [file 737_2022_1261_MOESM1_ESM.pdf]

**Supplementary Table****Premenstrual Symptom Interference by Country**

| <b>COUNTRY</b>         | <b>% Reporting Premenstrual Symptom Interference Every Cycle</b> |
|------------------------|------------------------------------------------------------------|
| Egypt                  | 35.95                                                            |
| Pakistan               | 34.66                                                            |
| Brazil                 | 31.96                                                            |
| Morocco                | 31.22                                                            |
| Iran                   | 30.48                                                            |
| Jordan                 | 29.52                                                            |
| Bangladesh             | 29.15                                                            |
| Sweden                 | 29.15                                                            |
| UK                     | 28.47                                                            |
| India                  | 28.39                                                            |
| Lebanon                | 28.32                                                            |
| Tunisia                | 28.1                                                             |
| Saudi Arabia           | 28.05                                                            |
| Qatar                  | 27.9                                                             |
| United Arab Emirates   | 27.19                                                            |
| Philippines            | 27.18                                                            |
| Iraq                   | 26.85                                                            |
| Algeria                | 26.76                                                            |
| Brunei Darussalam      | 26.61                                                            |
| Korea                  | 26.61                                                            |
| Turkey                 | 26.59                                                            |
| Bosnia and Herzegovina | 26.55                                                            |
| Israel                 | 26.19                                                            |
| Canada                 | 26.1                                                             |
| Kuwait                 | 25.99                                                            |
| US                     | 25.76                                                            |
| Lithuania              | 25.65                                                            |
| Serbia                 | 25.56                                                            |
| Japan                  | 25.35                                                            |
| Cyprus                 | 25.34                                                            |
| Macedonia              | 25.2                                                             |
| Russian Federation     | 25.13                                                            |
| Greece                 | 24.9                                                             |
| Malta                  | 24.86                                                            |
| Ethiopia               | 24.81                                                            |
| Ireland                | 24.8                                                             |
| Thailand               | 24.57                                                            |
| Uganda                 | 24.51                                                            |

|                |       |
|----------------|-------|
| Romania        | 24.42 |
| Viet Nam       | 24.36 |
| Portugal       | 24.23 |
| Botswana       | 24.17 |
| Belarus        | 24.14 |
| Australia      | 24.03 |
| Indonesia      | 23.97 |
| Nepal          | 23.95 |
| Sri Lanka      | 23.89 |
| Mauritius      | 23.84 |
| Denmark        | 23.71 |
| Moldova        | 23.65 |
| Hungary        | 23.44 |
| Latvia         | 23.43 |
| Croatia        | 23.3  |
| Malaysia       | 23.27 |
| Bulgaria       | 23.15 |
| Georgia        | 23.15 |
| Maldives       | 23.03 |
| Czech Republic | 22.86 |
| Norway         | 22.73 |
| France         | 22.63 |
| Malawi         | 22.62 |
| Armenia        | 22.51 |
| Réunion        | 22.44 |
| Ukraine        | 22.35 |
| Azerbaijan     | 22.12 |
| Mozambique     | 22.01 |
| Slovenia       | 22.01 |
| Kyrgyzstan     | 21.93 |
| Angola         | 21.79 |
| South Africa   | 21.75 |
| Zambia         | 21.71 |
| New Zealand    | 21.69 |
| Andorra        | 21.36 |
| Burkina Faso   | 21.29 |
| China          | 21.17 |
| Estonia        | 21.06 |
| Albania        | 21.03 |
| Switzerland    | 21.01 |
| Kenya          | 20.96 |

|                     |       |
|---------------------|-------|
| Taiwan              | 20.87 |
| Uzbekistan          | 20.77 |
| Kazakhstan          | 20.52 |
| Singapore           | 20.44 |
| Germany             | 20.4  |
| Namibia             | 20.3  |
| Peru                | 20.19 |
| Honduras            | 20.18 |
| Iceland             | 20.17 |
| Bolivia             | 20.1  |
| Slovakia            | 20.1  |
| Belgium             | 20.02 |
| Poland              | 19.98 |
| Trinidad and Tobago | 19.96 |
| Barbados            | 19.91 |
| Cabo Verde          | 19.91 |
| Tanzania            | 19.9  |
| Turkmenistan        | 19.9  |
| Belize              | 19.88 |
| Italy               | 19.88 |
| Guadeloupe          | 19.76 |
| Spain               | 19.68 |
| Costa Rica          | 19.62 |
| Netherlands         | 19.22 |
| Puerto Rico         | 19.13 |
| Senegal             | 19.13 |
| Chile               | 19.07 |
| Hong Kong           | 19    |
| Panama              | 18.92 |
| Paraguay            | 18.61 |
| Benin               | 18.6  |
| Ecuador             | 18.44 |
| Austria             | 18.36 |
| Guatemala           | 18.35 |
| Nicaragua           | 18.33 |
| Colombia            | 18.3  |
| El Salvador         | 17.97 |
| Zimbabwe            | 17.87 |
| Côte d'Ivoire       | 17.66 |
| Guyana              | 17.52 |
| Finland             | 17.47 |

|                    |       |
|--------------------|-------|
| Jamaica            | 17.44 |
| Dominican Republic | 17.2  |
| Haiti              | 16.83 |
| Tajikistan         | 16.63 |
| Uruguay            | 16.57 |
| Fiji               | 16.56 |
| Bahamas            | 16.42 |
| Mexico             | 16.22 |
| Argentina          | 16.03 |
| Suriname           | 15.91 |
| Cuba               | 15.65 |
| Venezuela          | 15.64 |
| Togo               | 15.48 |
| Ghana              | 14.8  |
| Mali               | 14.74 |
| Guinea             | 14.29 |
| Cameroon           | 14.11 |
| Nigeria            | 13.88 |
| Gabon              | 13.48 |
| Congo              | 12.27 |

Percentage of participants reporting premenstrual symptoms causing interference in daily functioning every menstrual cycle by country.
